# Supplementary material for: VaSDC1 Is Involved in Modulation of Flavonoid Metabolic Pathways in Black and Red Seed Coats in Adzuki Bean (Vigna angularis L.)
Source: Front Plant Sci. 2021 Jul 26;12:679892. doi: 10.3389/fpls.2021.679892 (PMC8350769; doi:10.3389/fpls.2021.679892)
Supplement: Supplementary Table 1 — The description of genes and primers used in this study. [file Table_1.XLSX]

## Sheet: Table S1
Table S1 The description of genes and primers used in this study
	Forward Primer	Tm-F(℃)	Reverse Primer	Tm-R(℃)	Product longth(bp)
Sca326-1	CTCCATCAAATACACGAAGAA	51.8	CGGTACACAAATATTTAGAGG	50.4	293
Sca326-2	AACACATATCCTTCCATCCCT	57	TGCAAGGTATAGGCATTGAAC	55.2	158
Sca326-3	AAAGAATTCATAAACGTCACA	51.2	AAATATCTGTTTGACAACTGC	52.4	196
Sca326-4	AAGAATAACCAGTCTGCATCA	54.9	TCTATCATTCAGTTTCCACAC	51.2	193
Sca326-5	TTTTCTCTCTCCTCTTTCGTC	52.6	CTTGACAGTTTGATGGAGCTT	55.8	140
Sca326-6	GGTTGTTAATCTTACAAGTCC	51.6	CTCTGCTATTTACATAGGGAA	52.8	114
Sca326-7	TTAGGAACTCATTTGCATAA	49.4	GAAATGTTAAGCATTAAGAGC	50.3	181
Sca326-8	CTGTGATGCTCTGAGAAGTGG	54.8	AAACTGACCTTGGGAACGGAA	60.2	133
Sca326-9	GAGTATAATTTGTCCCTCCAA	51.3	AAAGTCATGAAAACGTGCAAT	54.4	176
Sca326-10	ATGAACGGAATCATTGATAAA	51.6	GGAAGCAGATTGTATTTGTCC	53.8	127
Sca326-12	TTAGAACTTCAGACAAACCTT	51.2	GCTCAAAGACAAATTAGTCAC	51.8	159
BAgs007	GTTTTTCAAGCCTTTGGTGCTAA	61.7	TTTTCTTTTCAGTAAGACATCCAGTACA	60.7	150
