# Supplementary material for: VaSDC1 Is Involved in Modulation of Flavonoid Metabolic Pathways in Black and Red Seed Coats in Adzuki Bean (Vigna angularis L.)
Source: Front Plant Sci. 2021 Jul 26;12:679892. doi: 10.3389/fpls.2021.679892 (PMC8350769; doi:10.3389/fpls.2021.679892)
Supplement: Supplementary Table 2 — The description of primers for SSR markers. [file Table_2.XLSX]

## Sheet: Table S2
Table S2 Primers for SSR markers
Gene ID	Gene Name	Forward Primer	Tm-F(℃)	Reverse Primer	Tm-R(℃)	Product longth(bp)	Arabidopsis homolog
LOC108327158	VaSDC1	CGCCGGAAAGTACAATCTCACA	60.1	ACTCATCAATTTCCCATGCACCA	61.3	153	AT1G56650
LOC108336026	VaCHS1	AACCCCACCAAACTGCGTTG	62.1	CCATGTAAGCACTCATGTTCGGAT	61.4	199	AT5G13930
LOC108319876	VaCHS2	CGTGCCCGGAATCATCTCGAA	60.6	ATGTGCAATCCAAAAGATCGAGT	60.6	100	AT5G13930
LOC108320820	VaCHS3	AAAATGGACTTAAAACCACAGGTGA	58.9	ATATTGCGACACTATGGAGAACAACG	58.5	105	AT5G13930
LOC108320822	VaCHS4	ACTCCACCTAATTGTGTTGATCAGAGC	62.4	AAACTTCTCCTTGAGGTCGGTCA	62	93	AT5G13930
LOC108320823	VaCHS5	AAACCAGAAAAGATGAAGGCCACT	60.6	CACACCCCATTCAAGTCCTTCACC	61.9	150	AT5G13930
LOC108325855	VaCHI1	CTATCCTTTTCACAGTGTCACCCAA	60.9	CGCCATGCTTACCAATCATCGACT	62.2	144	AT3G55120
LOC108330729	VaCHI2	ATTTAACTATGGCTGCAGAACAGG	60.2	AGGCTCGAAATAGACCCCGAT	62.2	161	AT3G55120
LOC108329986	VaF3'H	TGAGCACCATTATTGAAGAACACGA	59.7	TCTCTGTGTGAGTAAGATGGTTTCCG	60	111	AT3G51240
LOC108345990	VaF3'5'H	ACAGAAAGCACCCTTCAACTCC	61.2	AGAACCTCTCTGGCTTAAACTCG	60.8	171	AT5G07990
LOC108323664	VaF3H	ATCTTTTTAGTTTGAACCTGTCGAG	57.3	AAAGGTGGTTTGAGTGATACAAGC	58.8	132	AT3G51240
LOC108336367	VaDFR	CTGCACAGGAGTTTTCCACGTT	61.3	AGTAACCCCTTTATTGTCGGCTT	61.3	93	AT5G42800
LOC108335234	VaANS	AAGCTTGCCAACAATGCCAGT	62.9	AAAGTGCCTCCAGTATCTTCGT	61.3	181	AT4G22880
LOC108320295	VaBZ1	AACTCAAGTTTTGGCACACGAT	60.9	ATGGCCTACAAATCATAGGAACCC	61.1	107	AT5G17050
LOC108328964	Actin	CTAAGGCTAATCGTGAGAA	50.6	CGTAAATAGGAACCGTGT	50.8	165	AT3G53750
