# Supplementary material for: VaSDC1 Is Involved in Modulation of Flavonoid Metabolic Pathways in Black and Red Seed Coats in Adzuki Bean (Vigna angularis L.)
Source: Front Plant Sci. 2021 Jul 26;12:679892. doi: 10.3389/fpls.2021.679892 (PMC8350769; doi:10.3389/fpls.2021.679892)
Supplement: Supplementary Table 3 — Information about markers for gene mapping. [file Table_3.XLSX]

## Sheet: Table S3
Table S3 Information about markers for gene mapping
Marker Nmae	19F4004-1	19F4004-2	19F4004-3	19F4004-4	19F4004-5	19F4004-6	19F4004-7	19F4004-8	19F4004-9	19F4004-10	19F4004-11	19F4004-12	19F4004-13	19F4004-14	19F4004-15	19F4004-16	19F4004-17	19F4004-18	19F4004-19	19F4004-20	19F4004-21	19F4004-22	19F4004-23	19F4004-24	19F4004-25	19F4004-26	19F4004-27	19F4004-28	19F4004-29	19F4004-30	19F4004-31	19F4004-32	19F4004-33	19F4004-34	19F4004-35	19F4004-36	19F4004-37	19F4004-38	19F4004-39	19F4004-40	19F4004-41	19F4004-42	19F4004-43	19F4004-44	19F4004-45	19F4004-46	19F4004-47	19F4004-48	19F4004-49
Sca326-12	0	1	0	0	0	0	0	0	1	0	0	0	0	0	0	0	0	2	2	0	0	0	0	0	2	0	0	0	0	0	1	0	0	0	0	1	0	2	0	0	0	0	0	0	1	0	0	0	0
Sca326-4	0	1	0	0	0	0	0	0	1	0	0	0	1	0	0	0	2	2	2	0	0	0	0	0	2	0	0	0	0	0	2	0	0	0	0	1	0	2	2	0	1	0	0	0	1	0	0	0	0
SDC1	0	0	0	0	0	0	0	0	0	0	0	0	0	0	0	0	0	0	0	0	0	0	0	0	0	0	0	0	0	0	0	0	0	0	0	0	0	0	0	0	0	0	0	0	0	0	0	0	0
BAgs007	1	1	0	0	0	1	0	0	1	0	0	0	1	0	0	0	0	0	1	1	0	0	0	0	1	0	0	0	0	0	1	0	0	0	2	1	0	0	0	0	0	0	0	0	1	0	1	0	0
[truncated: 160 more columns]
